# Supplementary material
Source: PubMed Central journal article supplement (PMC5564393)

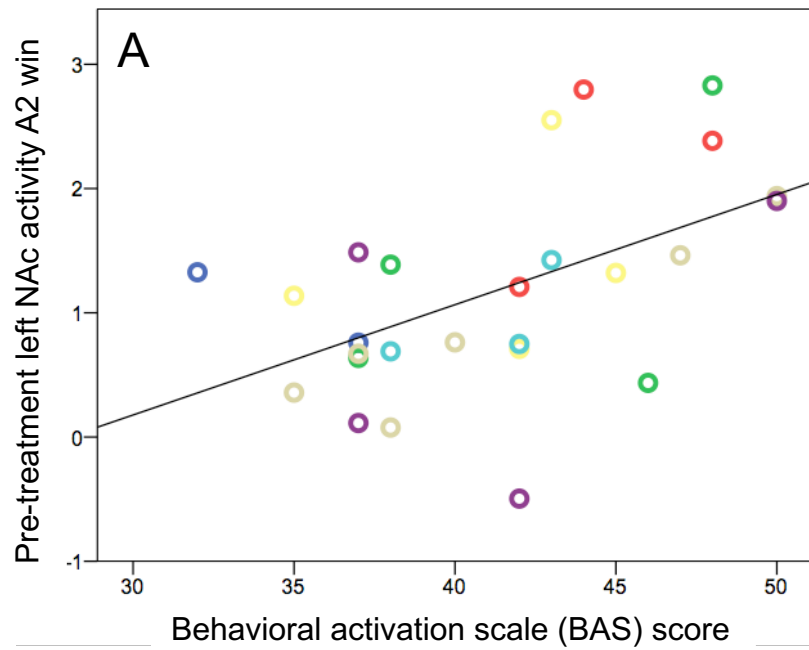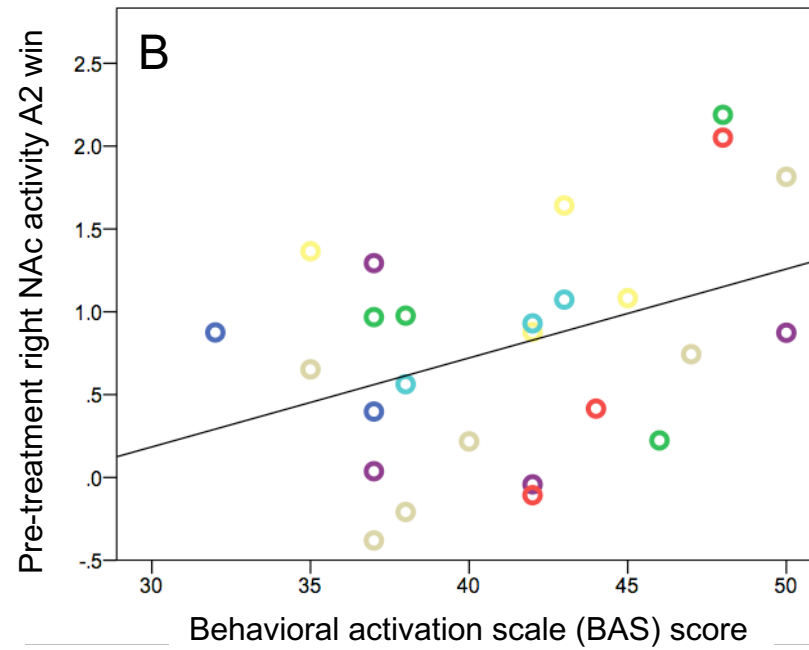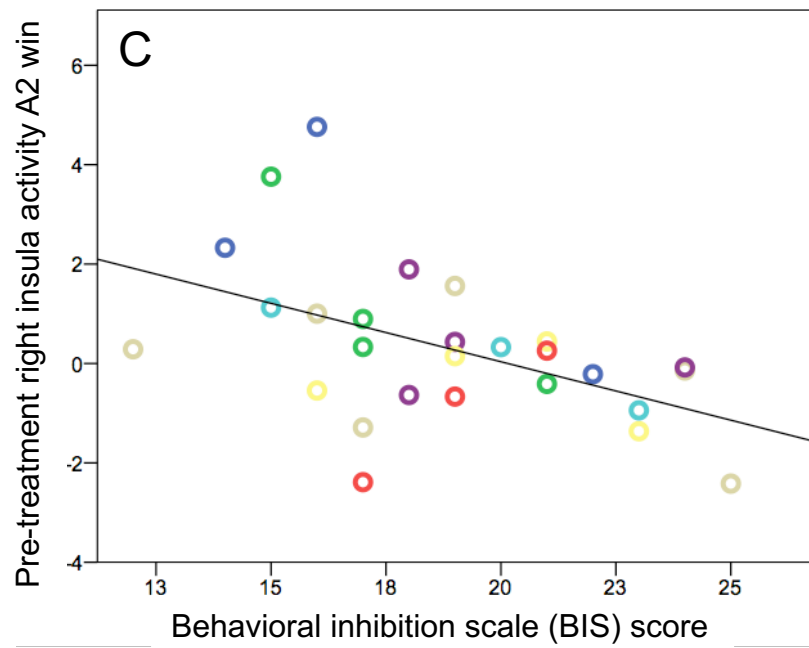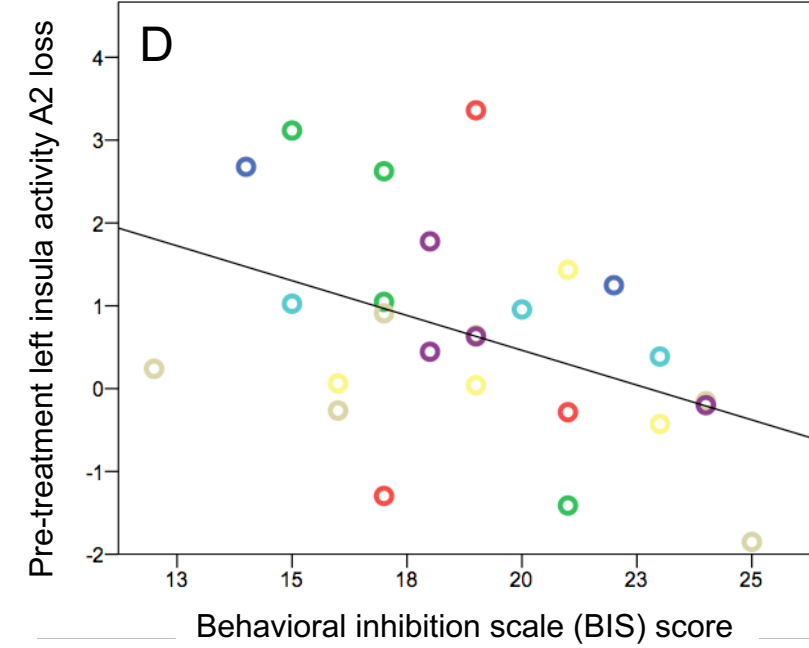

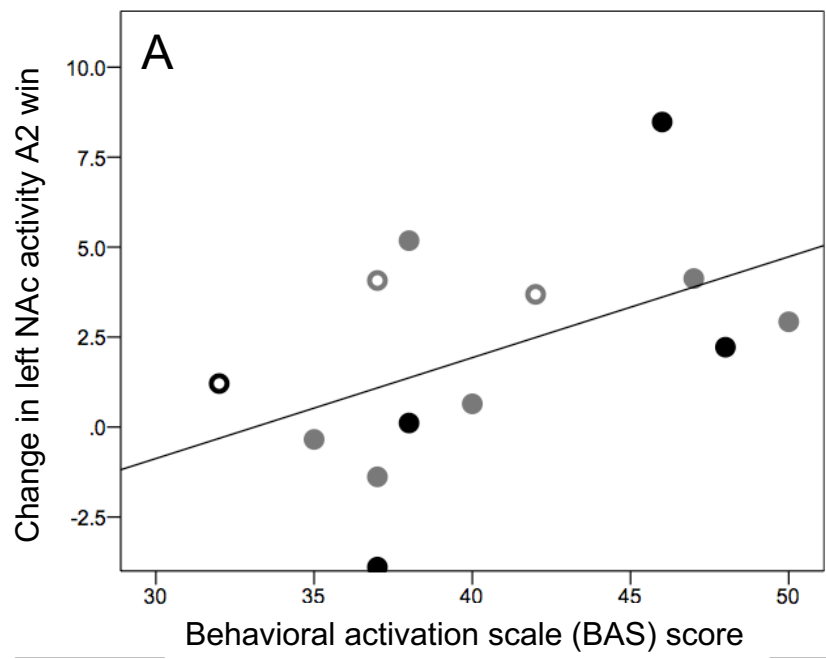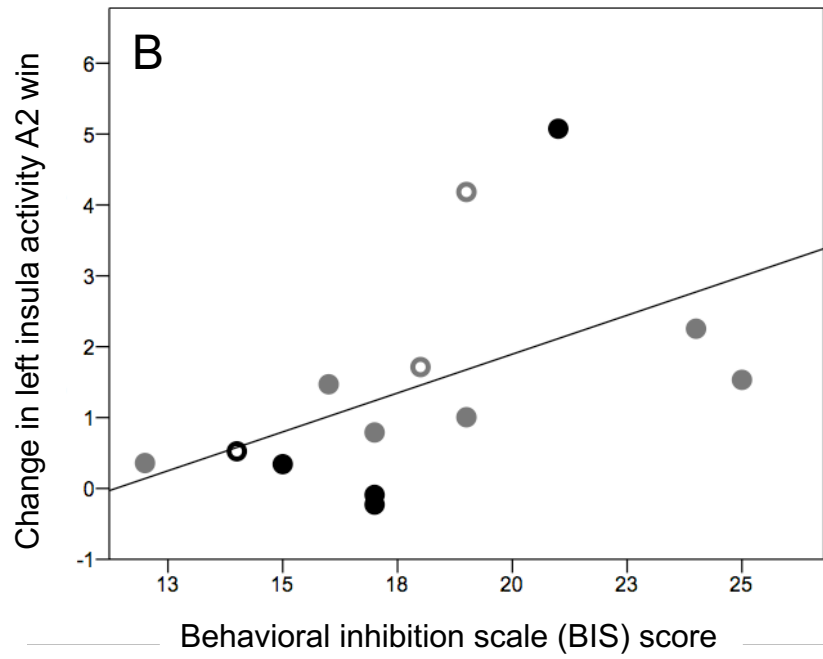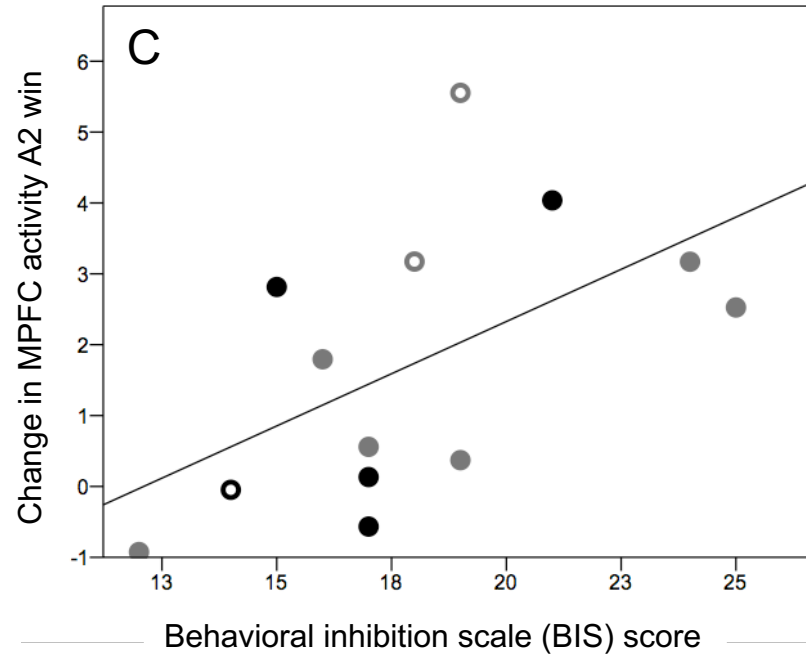

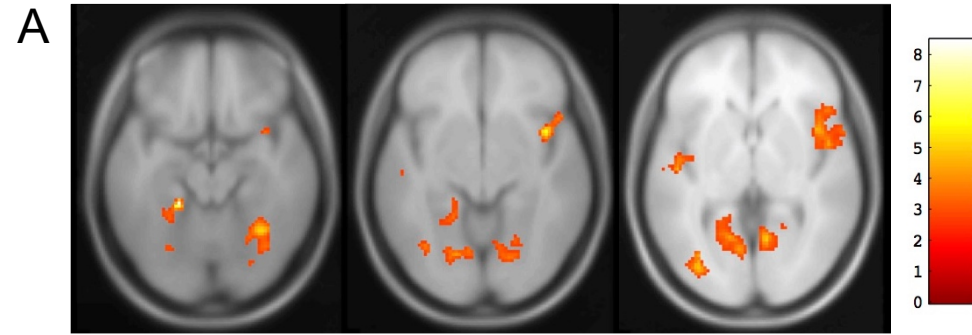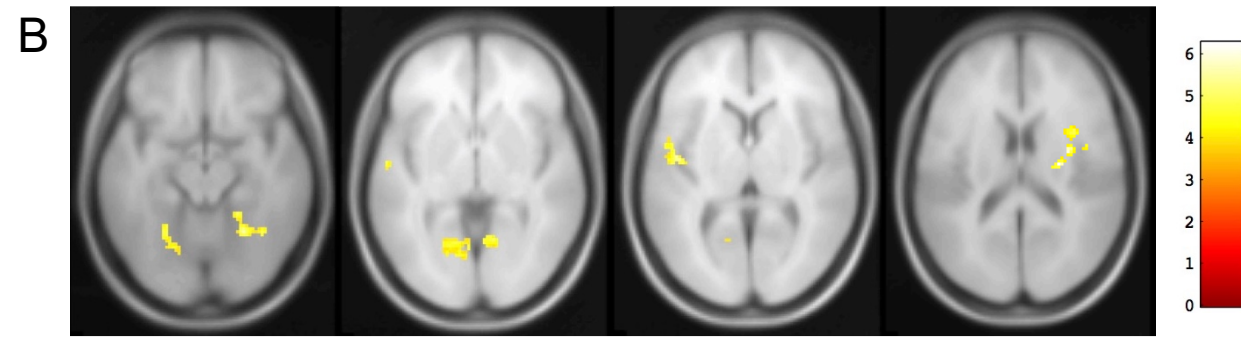

Supplement: NIHMS882035-supplement-Suppl_Figs_.pdf [file NIHMS882035-supplement-Suppl_Figs_.pdf]
